# Supplementary material for: Efficacy and safety of cosibelimab, an anti-PD-L1 antibody, in metastatic cutaneous squamous cell carcinoma
Source: PubMed Central journal article supplement — J Immunother Cancer. 2023 Oct 17;11(10):e007637. doi: 10.1136/jitc-2023-007637 (PMC10582968; doi:10.1136/jitc-2023-007637), 2023-10-17

**Supplementary Figure S3.** Objective response rate by group in responding participants who underwent tumor assessment by independent central review after treatment initiation. ECOG, Eastern Cooperative Oncology Group; ITT, intent-to-treat; PD-L1, programmed cell death ligand 1.

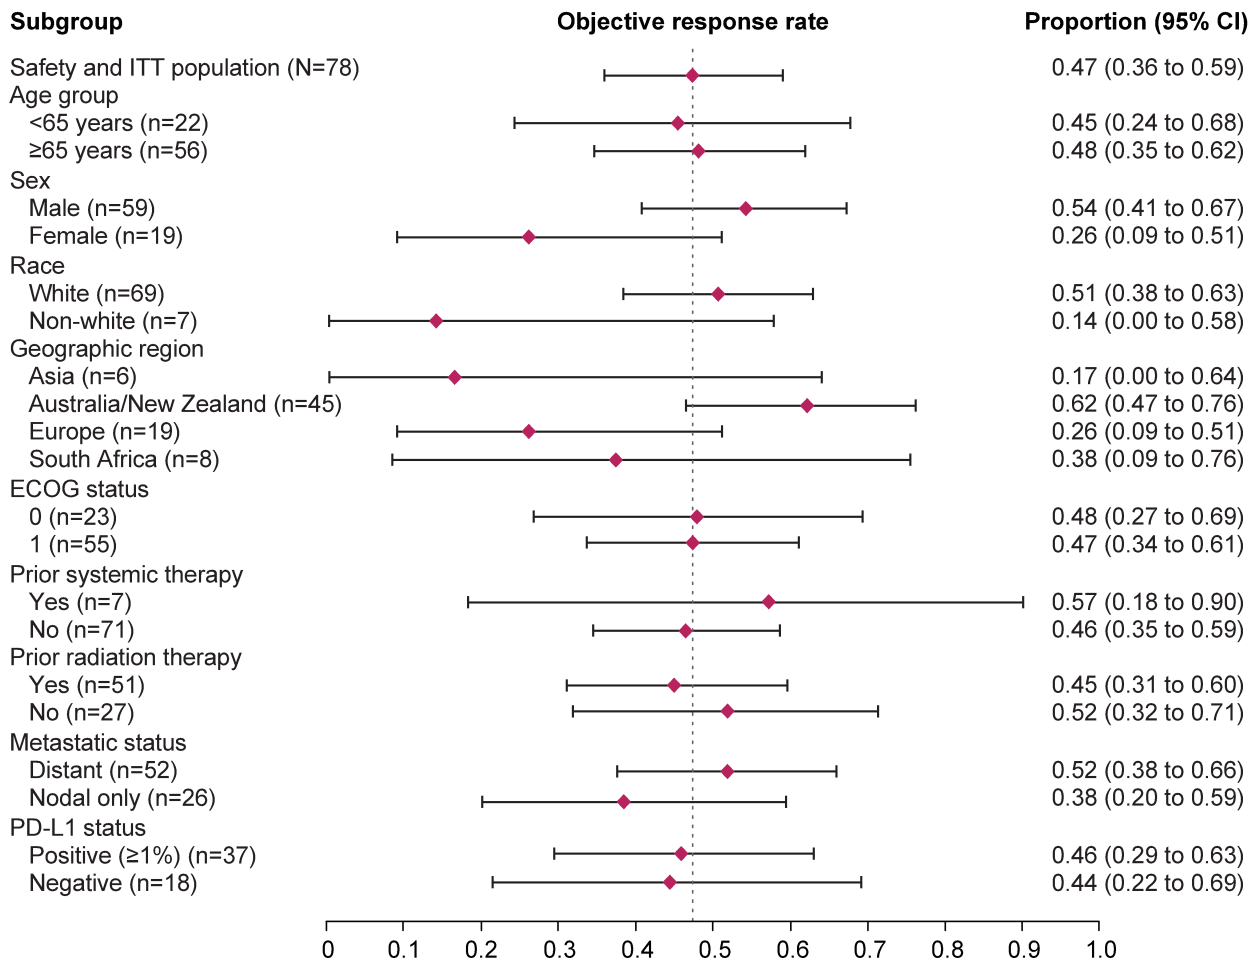

Supplement: jitc-2023-007637supp003.pdf [file jitc-2023-007637supp003.pdf]
