# Supplementary material for: Efficacy and safety of cosibelimab, an anti-PD-L1 antibody, in metastatic cutaneous squamous cell carcinoma
Source: PubMed Central journal article supplement — J Immunother Cancer. 2023 Oct 17;11(10):e007637. doi: 10.1136/jitc-2023-007637 (PMC10582968; doi:10.1136/jitc-2023-007637), 2023-10-17
Supplement: jitc-2023-007637supp004.pdf [file jitc-2023-007637supp004.pdf]

**Supplementary Table S1.** Summary of TRAEs

| <b>TRAE</b>                                    | <b>mCSCC<br/>(N=78)</b> |
|------------------------------------------------|-------------------------|
| Any, n (%)                                     | 56 (71.8)               |
| Grade 3                                        | 8 (10.3)                |
| Grade 4                                        | 0                       |
| Grade 5                                        | 0                       |
| Immune-related TRAE, n (%)                     | 15 (19.2)               |
| Grade $\geq 3$                                 | 1 (1.3)                 |
| Serious, n (%)                                 | 3 (3.8)                 |
| Occurring in $\geq 5\%$ of participants, n (%) |                         |
| Fatigue                                        | 10 (12.8)               |
| Rash                                           | 8 (10.3)                |
| Diarrhea                                       | 5 (6.4)                 |
| Pruritus                                       | 5 (6.4)                 |
| Hypothyroidism                                 | 4 (5.1)                 |
| Infusion-related reaction                      | 4 (5.1)                 |
| Lipase increased                               | 4 (5.1)                 |

mCSCC, metastatic cutaneous squamous cell carcinoma; TRAE, treatment-related adverse event.
