# Supplementary figures and images for: Efficacy and safety of cosibelimab, an anti-PD-L1 antibody, in metastatic cutaneous squamous cell carcinoma
Source: PubMed Central journal article supplement — J Immunother Cancer. 2023 Oct 17;11(10):e007637. doi: 10.1136/jitc-2023-007637 (PMC10582968; doi:10.1136/jitc-2023-007637), 2023-10-17

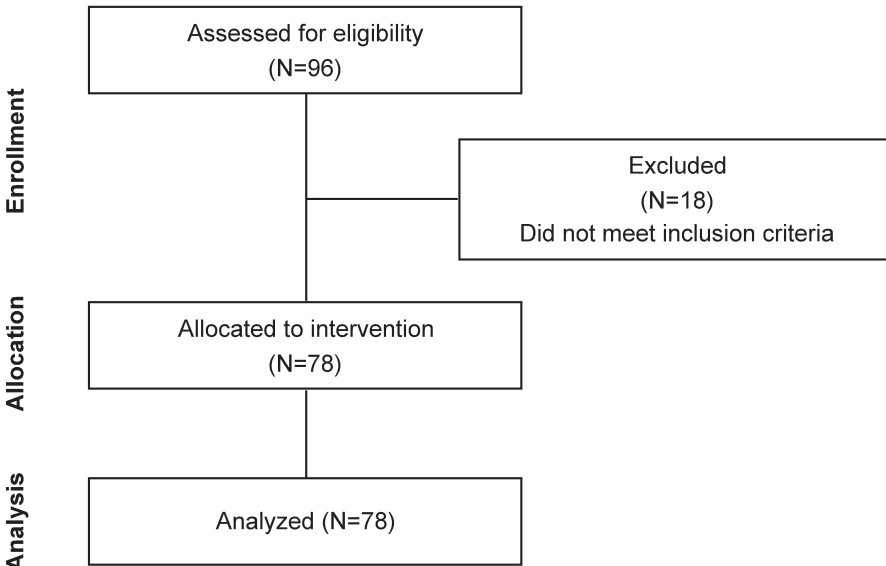

Supplement: jitc-2023-007637supp001.pdf [file jitc-2023-007637supp001.pdf]

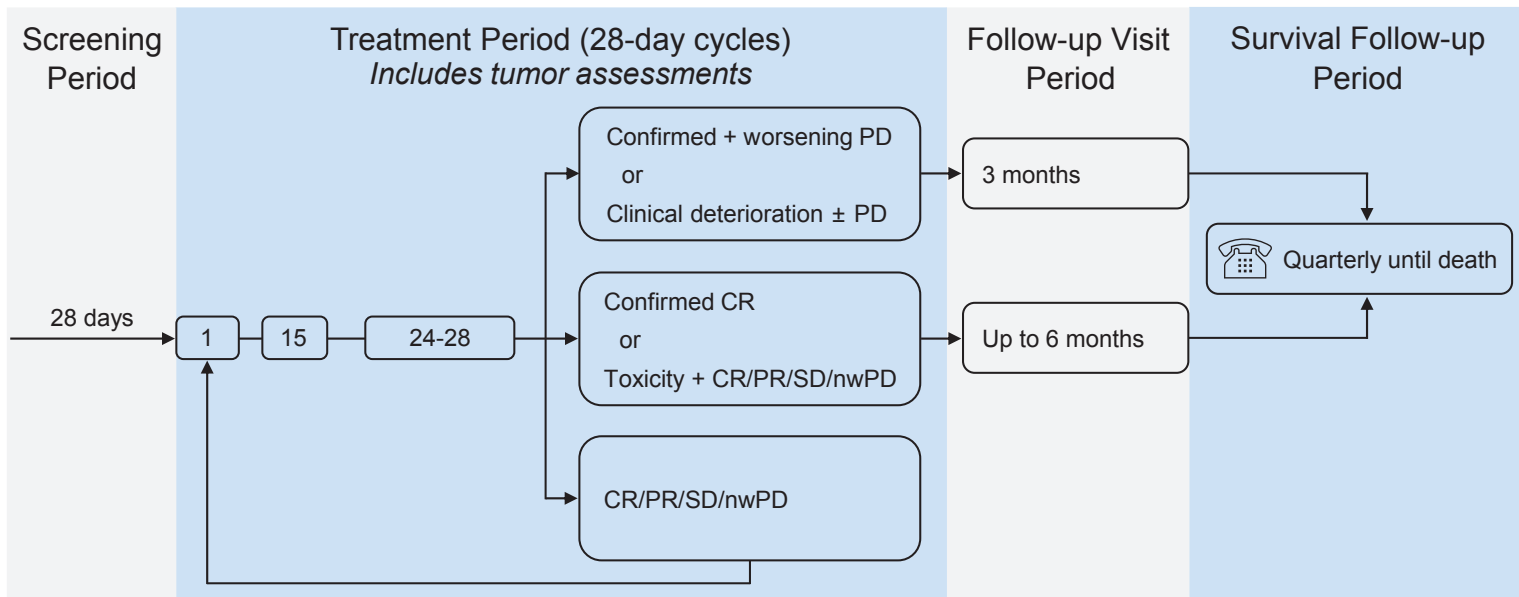

Supplement: jitc-2023-007637supp002.pdf [file jitc-2023-007637supp002.pdf]
